# Supplementary material for: Interlaced Pd–Ag nanowires rich in grain boundary defects for boosting oxygen reduction electrocatalysis
Source: Royal Society of Chemistry journal article supplement (doi:10.1039/d0nr00046a), 2020-01-01
Supplement: d0nr00046a1.pdf [file d0nr00046a1.pdf]

## Supporting Information

### **Interlaced Pd-Ag nanowires rich in grain boundary defects for boosting oxygen reduction electrocatalysis**

Xiao-Jing Liu<sup>‡a</sup>, Xing Yin<sup>‡a</sup>, Yi-Dan Sun<sup>a</sup>, Feng-Jiao Yu<sup>a\*</sup>, Xiang-Wen Gao<sup>b\*</sup>, Li-Jun Fu<sup>a</sup>, Yu-Ping Wu<sup>a</sup> and Yu-Hui Chen<sup>a\*</sup>

<sup>a</sup> State Key Laboratory of Materials-oriented Chemical Engineering, School of Energy, Nanjing Tech University, Nanjing, Jiangsu, 211816, China

<sup>b</sup> Materials Science and Engineering Program and Department of Mechanical Engineering, The University of Texas at Austin, Austin 78712 TX, USA

#### **Methods**

##### **Chemical and Materials.**

Palladium(II)-acetylacetonate [Pd(acac)<sub>2</sub>] were received from sigma. AgNO<sub>3</sub>, polyvinylpyrrolidone (PVP, MW 55,000), ethylene glycol, H<sub>2</sub>SO<sub>4</sub>, HNO<sub>3</sub>, isopropanol, KOH were purchased from Shanghai Chemical Reagent Co. Ltd.

##### **Materials Characterization.**

Powder X-ray diffraction (XRD) was performed on a PANalytical Empyrean diffractometer with Cu K<sub>α</sub> radiation. HRTEM images and selected area electron diffraction (SAED) patterns were obtained on a JEOL-2011 electron microscope operating at 200 kV equipped with an Oxford Link ISIS system for EDS. XPS was taken on Thermo ESCALAB 250XI with an X-ray source (Mg K<sub>α</sub> *hν* = 1253.6 eV).

##### **Synthesis of Pd-Ag catalysts.**

Pd<sub>1</sub>Ag<sub>1</sub> nanowires were prepared via modified polyol process. In general, 30 mg of Pd(acac)<sub>2</sub>, 17 mg of AgNO<sub>3</sub>, 40 mg of polyvinylpyrrolidone (PVP, MW 55,000) were dissolved in 5 mL of ethylene glycol (EG). Under vigorous stirring, the mixture was heated to 80 °C until the solution was clear. The solution was further heated to 200 °C and refluxed for 2 h. The precipitate was centrifuged and washed with ethanol for several times.

Pd<sub>4</sub>Ag<sub>1</sub> and Pd<sub>1</sub>Ag<sub>4</sub> nanowires were synthesized via the same procedure above expect changing the mole ratio of Pd/Ag to 4/1 and 1/4 with the fixed total mole amount, respectively. Pd nanoparticle chains were obtained without the addition of AgNO<sub>3</sub> in the reaction.

Carbon nanotube (CNT) supported PdAg nanoparticles were prepared as below. CNTs were treated in acid to introduce more functional groups, which allows better and even growth of PdAg nanoparticles on the surface of carbon. Pristine CNTs were refluxed in the solution of concentrated H<sub>2</sub>SO<sub>4</sub>/ HNO<sub>3</sub>/ H<sub>2</sub>O (3/1/1 in volume) at 100 °C for 4 h, followed by washing with deionized water to neutrality. The functionalized CNTs were dispersed in EG under ultrasonication for 1 h. Pd(acac)<sub>2</sub>, AgNO<sub>3</sub> and PVP were added into the CNT (1 mg/ mL) dispersion. The solution was refluxed at 200 °C for 2 h. The precipitate was centrifuged and washed with ethanol for several times.

### **Electrocatalytic measurements**

PdAg catalysts were dispersed in 5 ml isopropanol aqueous (isopropanol/H<sub>2</sub>O: 4:1) solution by ultrasonication to form catalyst ink. For RDE, 10 µl of ink was dropped onto a polished glassy carbon (GC) electrode (5 mm diam.). The catalyst loading on glassy electrode was 25.5 µg cm<sup>-2</sup>. 20 wt.% Pt/C catalyst (Johnson Matthey) with the same mass loading were tested for comparison.

Electrochemical studies were carried out on a potentiostat (CH instrument, Shanghai, China.) with a rotation control (Pine Ins.). A three-electrode cell was constructed with a GC working electrode (WE), a Hg/HgO reference electrode (RE) and a platinum foil counter electrode (CE). 0.1 M aqueous KOH solution was used as electrolyte and O<sub>2</sub> was bubbled at least for 30 minutes before measurements. Before measurement, all the catalysts were activated by cyclic voltammograms running CV scans from 0.05 to 1.20 V (vs. RHE) under N<sub>2</sub> flowing at a scan rate of 250 mV s<sup>-1</sup> for 50 cycles. Linear sweep voltammetry measurement for ORR were performed in O<sub>2</sub> electrolyte with a scan rate of 10 mV s<sup>-1</sup> (electrode rotating rate: 1600 rpm)

The long-term stability test was conducted in saturated 0.1 M KOH solution by cycling the potential from 0.6-1.0 V (vs. RHE) at 100 mVs<sup>-1</sup> for 5000 cycles. The ORR polarization curves were then recorded after the potential cycling.

To evaluate the tolerance towards methanol, RDE electrodes with catalyst loading were held at 1600 rpm rotation in a 0.5 M methanol and 0.1 M KOH mixed solution, and the LSV were recorded at 10 mVs<sup>-1</sup>.

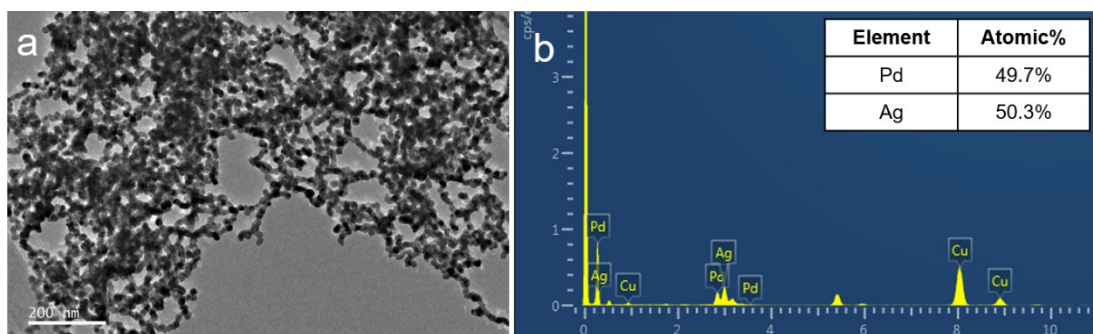

**Fig. S1** (a) TEM image and (b) EDS result of the obtained Pt-Ag nanowires.

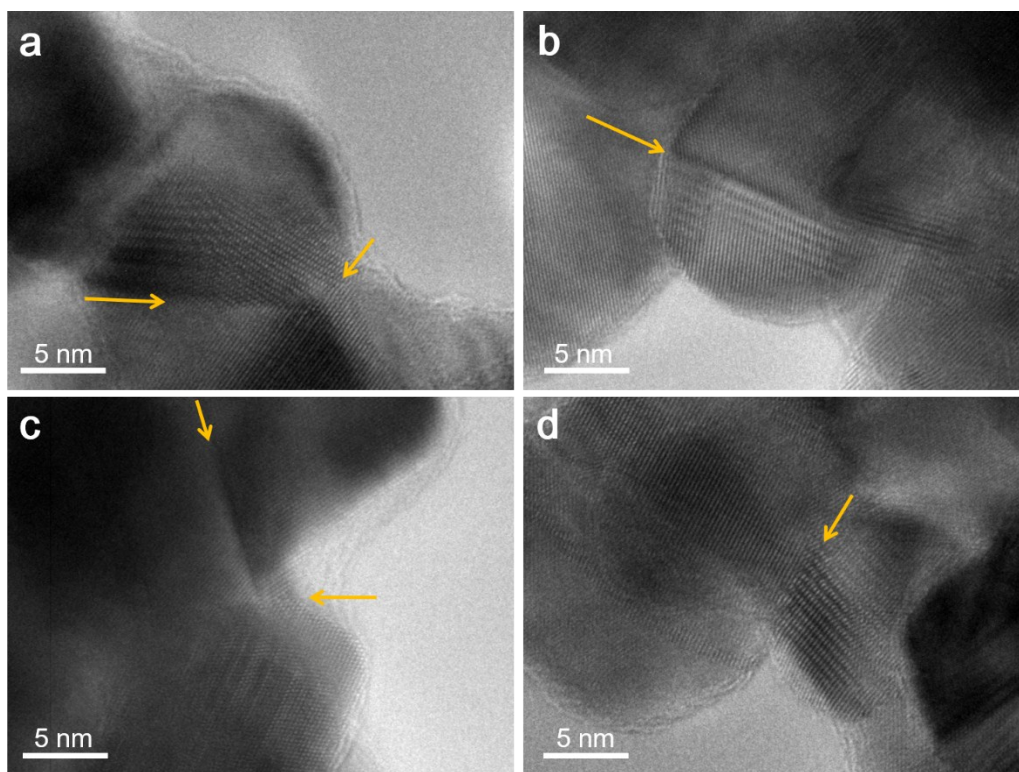

**Fig. S2** (a-d) HRTEM images of Pd<sub>1</sub>Ag<sub>1</sub> NWs.

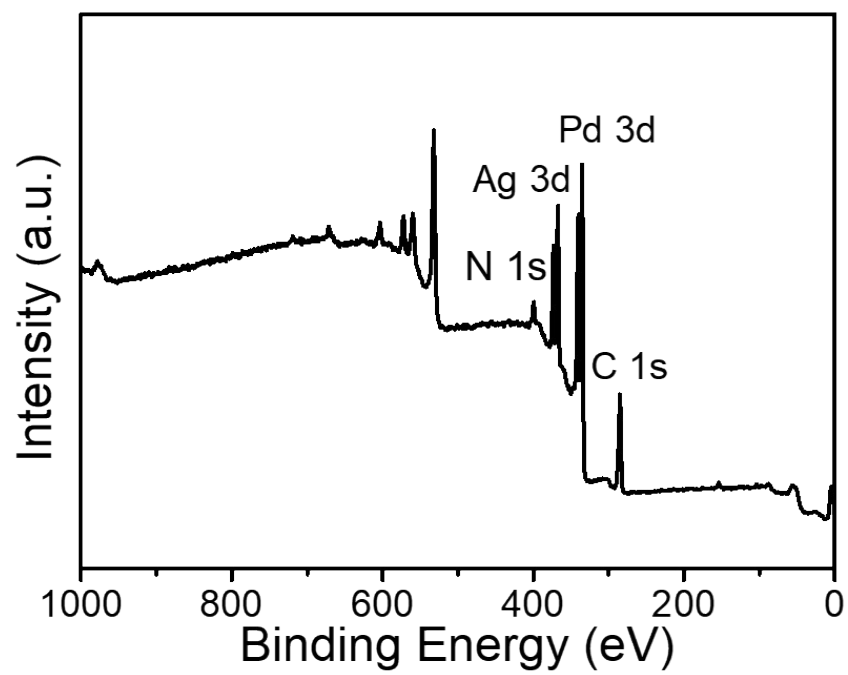

**Fig. S3** XPS survey spectrum of Pd<sub>1</sub>Ag<sub>1</sub> NWs.

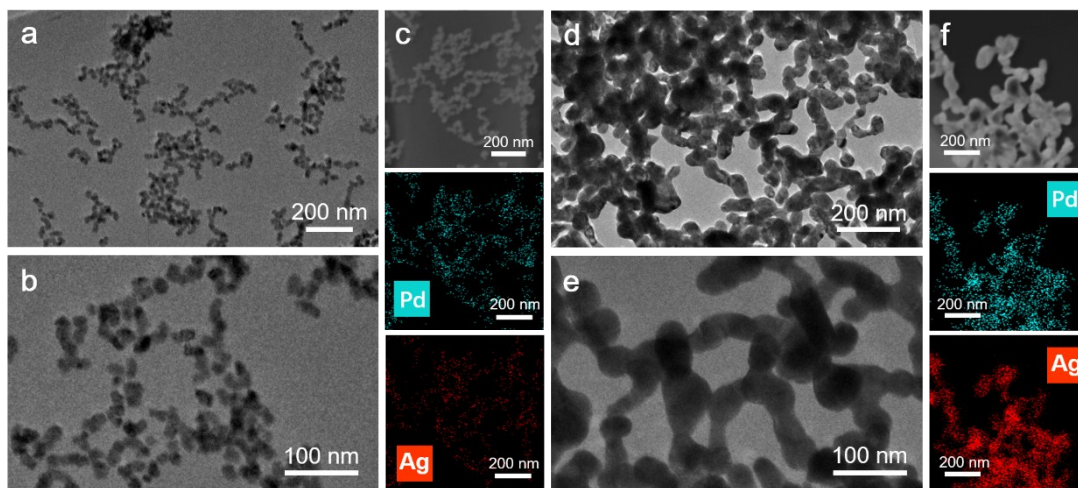

**Fig. S4** (a, b) (d, e) TEM images of Pd<sub>4</sub>Ag<sub>1</sub> and Pd<sub>1</sub>Ag<sub>4</sub> NWs; (c, f) elemental mapping of Pd<sub>4</sub>Ag<sub>1</sub> and Pd<sub>1</sub>Ag<sub>4</sub> NWs, respectively.

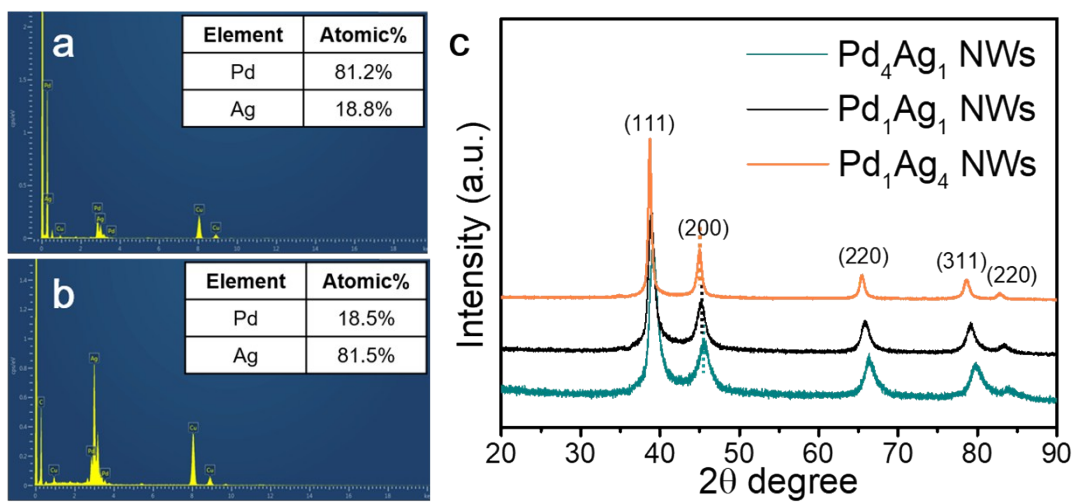

**Fig. S5** (a-b) EDS and the corresponding element atomic ratio of Pd<sub>4</sub>Ag<sub>1</sub> and Pd<sub>1</sub>Ag<sub>4</sub> NWs. (C) XRD patterns of Pd<sub>4</sub>Ag<sub>1</sub>, Pd<sub>1</sub>Ag<sub>1</sub> and Pd<sub>1</sub>Ag<sub>4</sub> NWs.

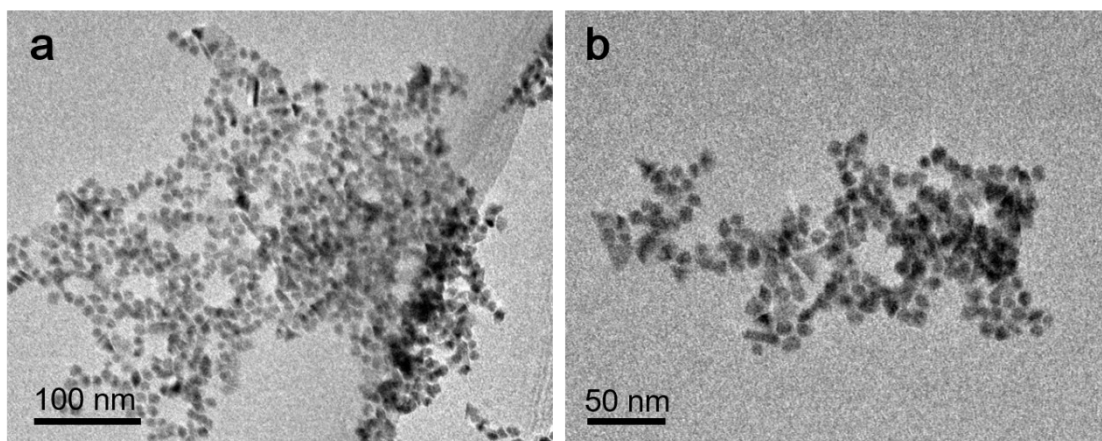

**Fig. S6** TEM images of the product of without the addition of  $\text{AgNO}_3$  in the reaction.



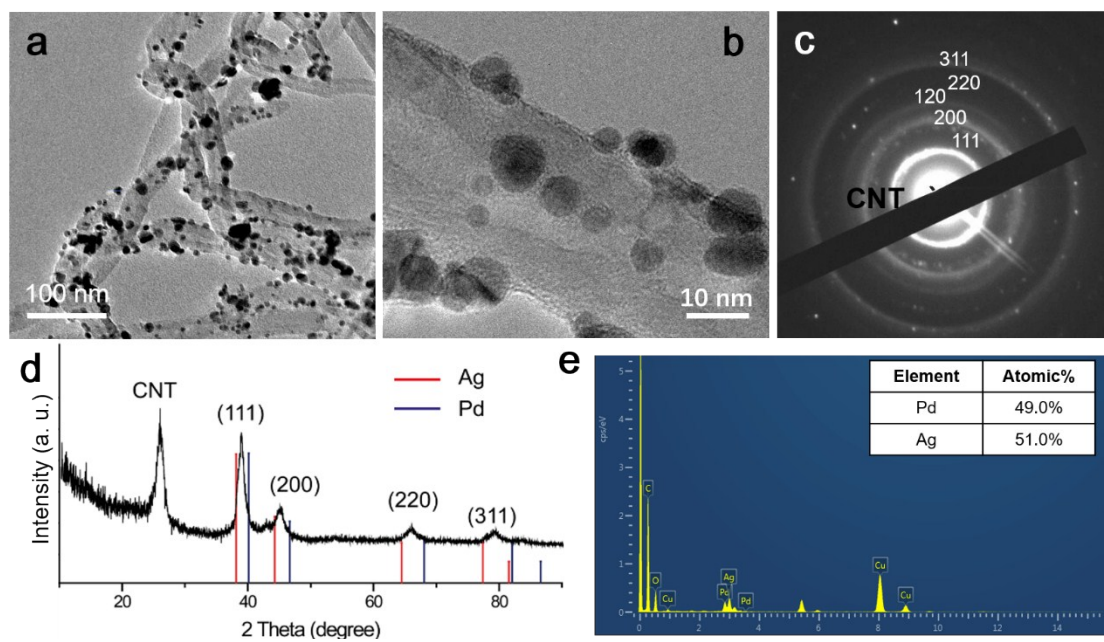

**Fig. S7** (a-b) TEM image of carbon tubes supported PdAg nanoparticles; (c) the corresponding selected-area electron diffraction pattern; (d) XRD pattern; (e) EDS result.

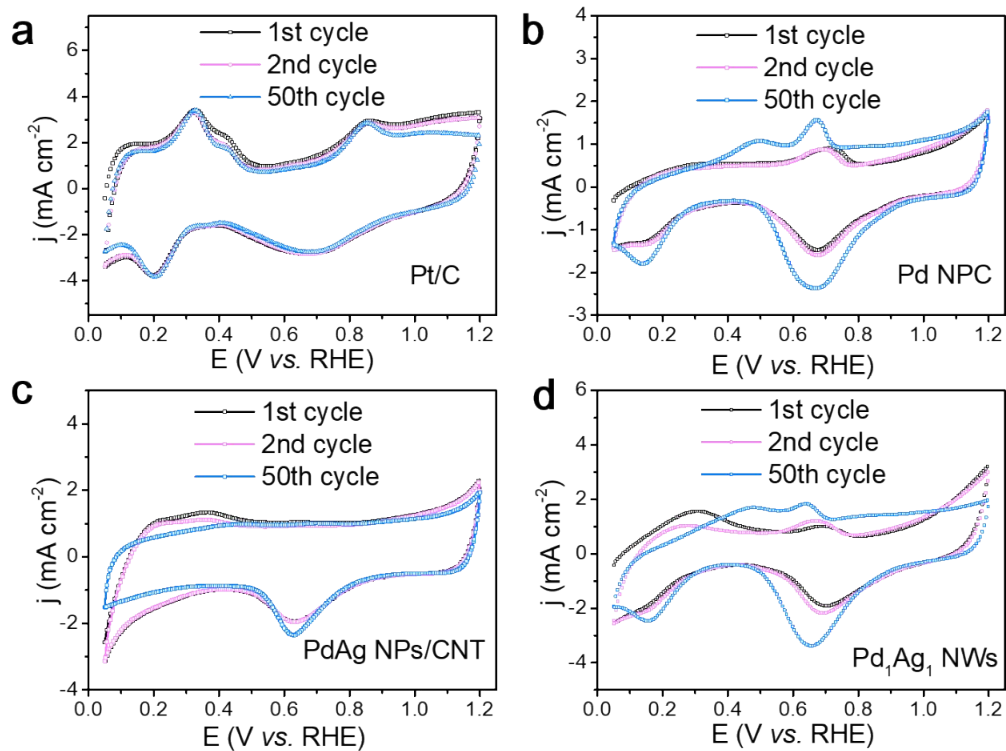

**Fig. S8** (a-d) CV curves of the 1<sup>st</sup>, 2<sup>nd</sup> and 50<sup>th</sup> cycles of Pt/C, Pd NPC, PdAg NPs/CNT, and Pd<sub>1</sub>Ag<sub>1</sub> NWs, respectively.

| Catalysts                                                  | Electrolyte                          | Mass activity                                                                                  | Reference        |
|------------------------------------------------------------|--------------------------------------|------------------------------------------------------------------------------------------------|------------------|
| AuPd NPs/RGOs                                              | 0.1 M KOH                            | 0.015 A mg <sup>-1</sup> <sub>Pd</sub>                                                         | 1                |
| Ni@Pd <sub>3</sub> /C NPs                                  | 0.1 M KOH                            | 0.038 A mg <sup>-1</sup> (0.9V)                                                                | 2                |
| Pd nanocubes@Mo/C                                          | 0.1 M KOH                            | 0.11A mg <sup>-1</sup> <sub>Pd</sub> (0.85V)                                                   | 3                |
| Pd-Ni/CNFO 1:2                                             | 0.1 M KOH                            | 0.098 A mg <sup>-1</sup> (0.85V)                                                               | 4                |
| PdNi Hollow Nanoparticles                                  | 0.1 M KOH                            | 1.81×10 <sup>-4</sup> A mg <sup>-1</sup>                                                       | 5                |
| Pd <sub>6</sub> Sn <sub>3</sub> Co intermetallic compounds | 0.5M KOH                             | 0.03 A mg <sup>-1</sup> (0.9V)                                                                 | 6                |
| CuPd/graphene                                              | 0.1 M KOH                            | 0.045 A mg <sup>-1</sup> <sub>Pd</sub> (0.7V)                                                  | 7                |
| Pd-B/C                                                     | 0.1 M KOH<br>0.1 M HClO <sub>4</sub> | 0.145 A mg <sup>-1</sup> <sub>Pd</sub> (0.9V)<br>0.055 A mg <sup>-1</sup> <sub>Pd</sub> (0.9V) | 8                |
| Ordered Pd <sub>3</sub> Pb/C                               | 0.1 M KOH                            | 0.168 A mg <sup>-1</sup> <sub>Pd</sub>                                                         | 9                |
| MnPd <sub>3</sub> /C                                       | 0.1 M KOH                            | 0.051A mg <sup>-1</sup> (0.75V)                                                                | 10               |
| CoAuPd-3 NCs                                               | 0.1 M KOH                            | 0.082 A mg <sup>-1</sup> <sub>Pd</sub>                                                         | 11               |
| Pd <sub>1</sub> Ag <sub>1</sub> NWs                        | 0.1 M KOH                            | 0.103 A mg <sup>-1</sup> <sub>Pd</sub> (0.9 V)                                                 | <i>This work</i> |

**Table S1** Comparison of the ORR performance of Pd<sub>1</sub>Ag<sub>1</sub> NWs in alkaline medium with various Pd-based electrocatalysts previously reported.

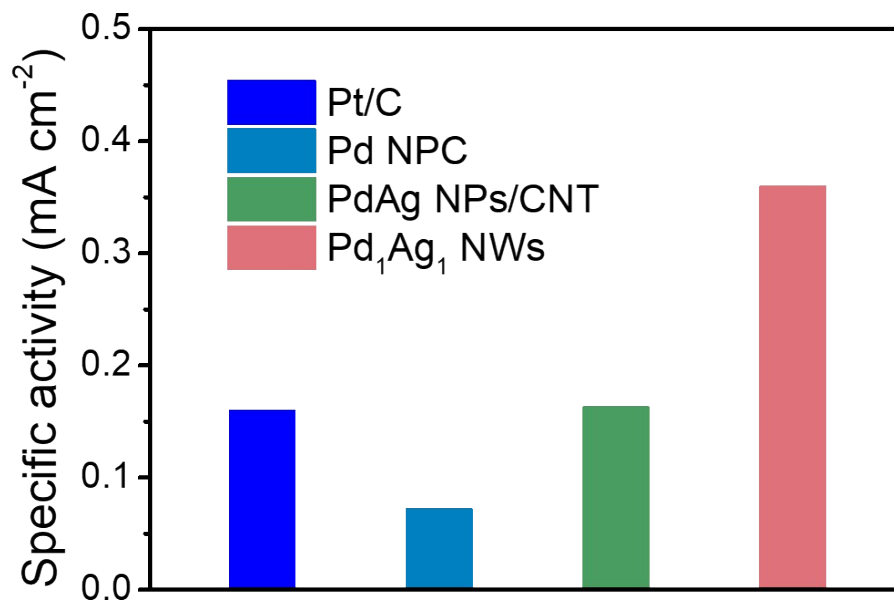

**Fig. S9** Comparison of specific activities of Pd<sub>1</sub>Ag<sub>1</sub> NWs, PdAg NPs/CNT, Pd NPC, and commercial Pt/C catalysts

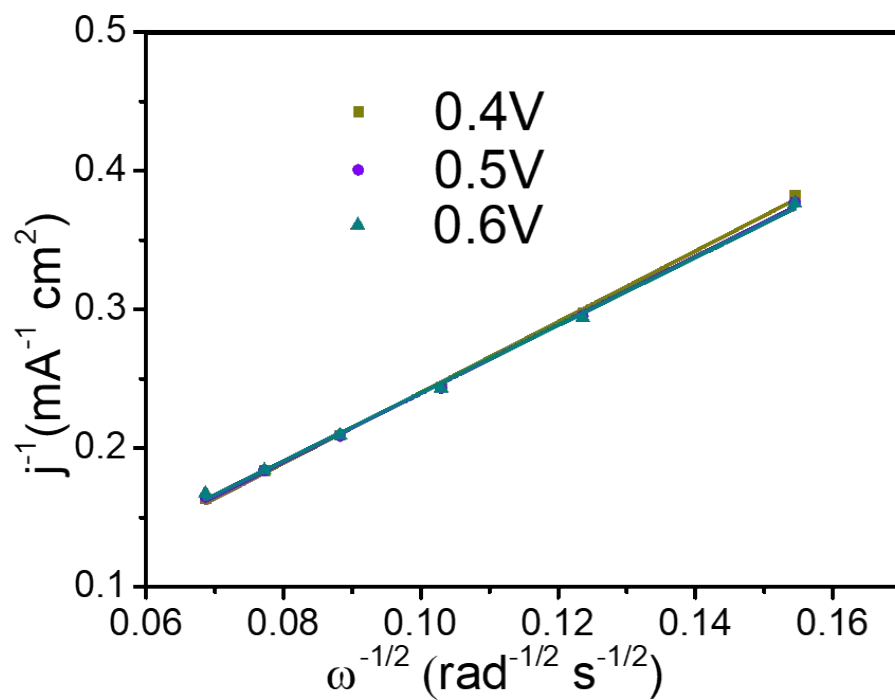

**Fig. S10** Koutecky-Levich plots for the Pd<sub>1</sub>Ag<sub>1</sub> NWs ( $j^{-1}$  vs.  $\omega^{-1/2}$ )

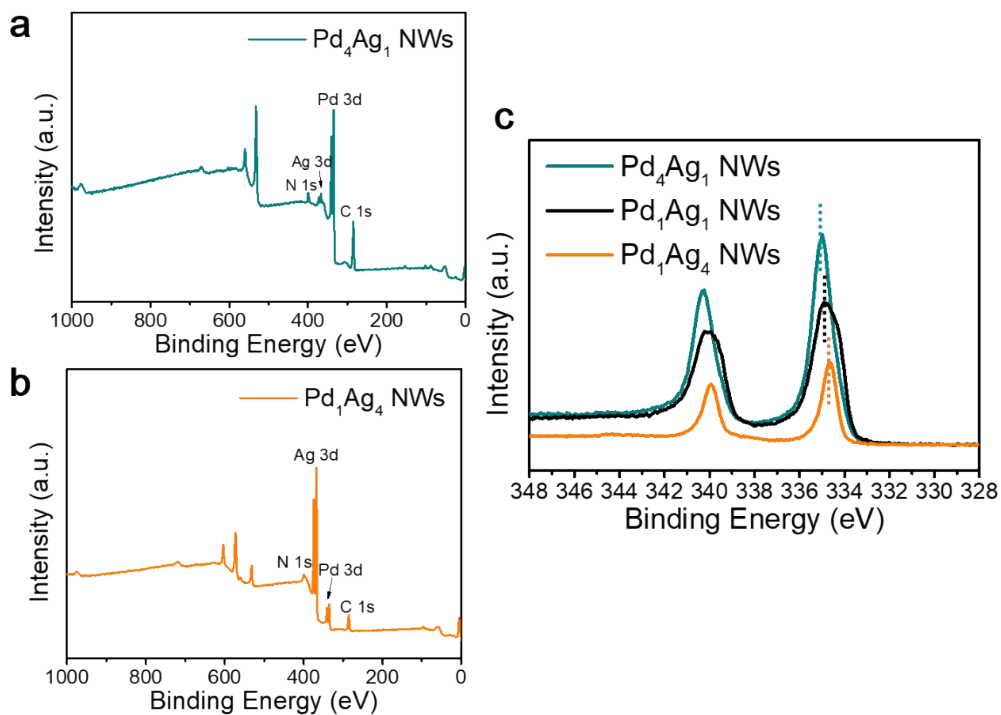

**Fig. S11** (a, b) XPS survey spectra of Pd<sub>4</sub>Ag<sub>1</sub> and Pd<sub>1</sub>Ag<sub>4</sub> NWs; (c) XPS spectra of Pd 3d region in Pd<sub>x</sub>Ag<sub>y</sub> NWs with different Pd/Ag ratio (Pd<sub>4</sub>Ag<sub>1</sub>, Pd<sub>1</sub>Ag<sub>1</sub>, Pd<sub>1</sub>Ag<sub>4</sub>).

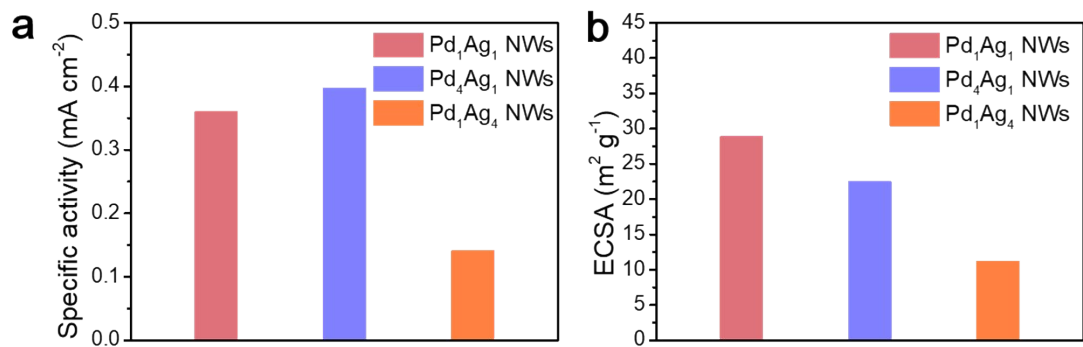

**Fig. S12** Comparison of specific activities and ECSAs of Pd<sub>1</sub>Ag<sub>1</sub>, Pd<sub>4</sub>Ag<sub>1</sub>, and Pd<sub>1</sub>Ag<sub>4</sub> NWs.

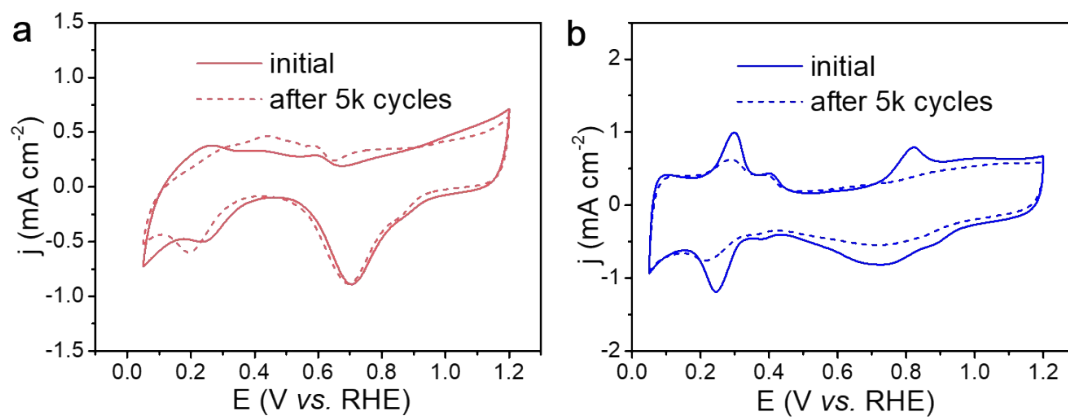

**Fig. S13** (a, b) CV of Pd<sub>1</sub>Ag<sub>1</sub> NWs and commercial Pt/C catalyst recorded in N<sub>2</sub>-saturated 0.1 KOH solution at 50 mVs<sup>-1</sup> before (the solid curve) and after (the dashed curve) stability test.



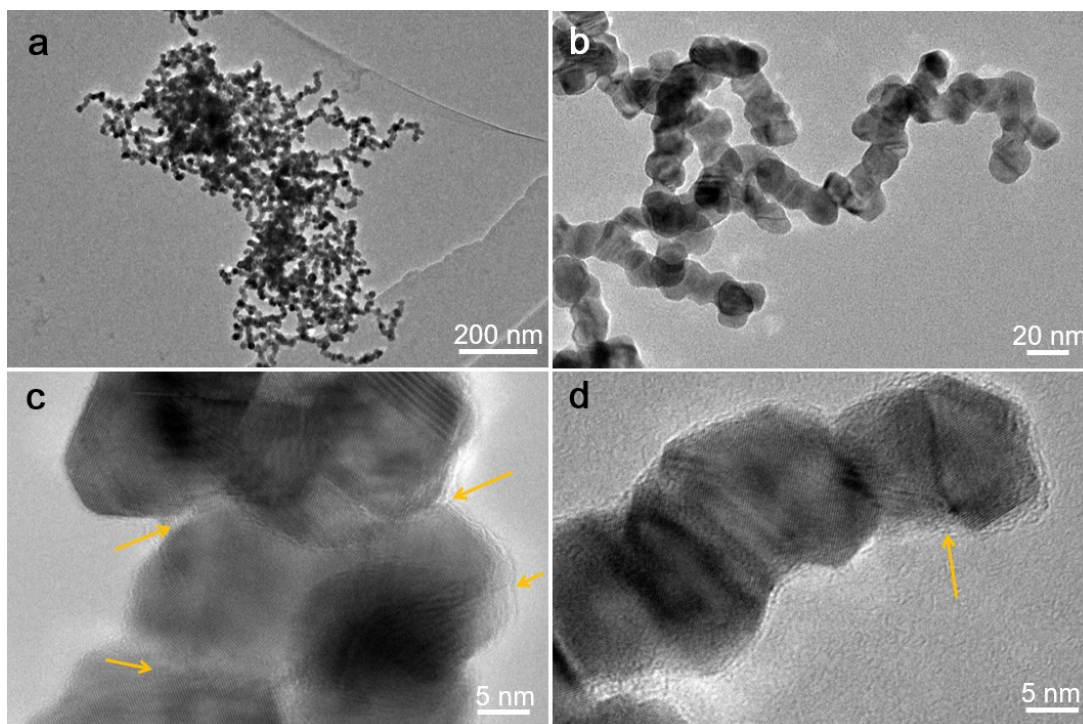

**Fig. S14** TEM (a, b) and HRTEM images (c, d) of Pd<sub>1</sub>Ag<sub>1</sub> NWs after stability test.

## Reference

1. J. J. Lv, S. S. Li, A. J. Wang, L. P. Mei, J. R. Chen and J. J. Feng, *Electrochim. Acta* 2014, **136**, 521-528.
2. J. Jiang, H. Gao, S. Lu, X. Zhang, C. Y. Wang, W. K. Wang and H. Q. Yu, *J. Mater. Chem. A*, 2017, **5**, 9233-9240.
3. W. Yan, W. Wu, K. Wang, Z. H. Tang and S. W. Chen, *Int. J. Hydrogen Energy* 2018, **43**, 17132-17141.
4. J. C. Calderon, V. Celorrio, M. J. Nieto-Monge, D. J. Fermin, J. I. Pardo, R. Moliner and M. J. Lazaro, *Int. J. Hydrogen Energy* 2016, **41**, 22538-22546.
5. M. Wang, W. Zhang, J. Wang, D. Wexler, S. D. Poynton, R. C. T. Slade, H. Liu, B. Winther-Jensen, R. Kerr, D. Shi and J. Chen, *ACS Appl. Mater. Interfaces* 2013, **5**, 12708-12715.
6. Y. Wu, C. Wang, L. Zou, Q. Huang and H. Yang, *J. Electroanal. Chem.* , 2017, **789**, 167-173.
7. Y. Zheng, S. Zhao, S. Liu, H. Yin, Y.-Y. Chen, J. Bao, M. Han and Z. Dai, *ACS Appl. Mater. Interfaces* 2015, **7**, 5347-5357.
8. M. Wang, X. Qin, K. Jiang, Y. Dong, M. Shao and W.-B. Cai, *J. Phys. Chem. C*, 2017, **121**, 3416-3423.
9. Z. Cui, H. Chen, M. Zhao and F. J. DiSalvo, *Nano Lett.* , 2016, **16**, 2560-2566.
10. Y. Lu, S. Zhao, R. Yang, D. Xu, J. Yang, Y. Lin, N.-E. Shi, Z. Dai, J. Bao and M. Han, *ACS Appl. Mater. Interfaces* 2018, **10**, 8155-8164.
11. L.-M. Luo, W. Zhan, R.-H. Zhang, D. Chen, Q.-Y. Hu, Y.-F. Guo and X.-W. Zhou, *J. Power Sources* 2019, **412**, 142-152.
